# Supplementary material for: Time-dependent inhibition of CYP3A4-mediated midazolam metabolism by macrolide antibiotics in CYP3A4 genetic variants: Comparison with testosterone metabolism
Source: PubMed Central journal article supplement (PMC8795987; doi:10.5414/cp203896), 2021-09-20
Supplement: intjclinpharmacol-59-12-745-S01.pdf [file intjclinpharmacol-59-12-745-S01.pdf]

Supplemental Table. Comparison between the  $K_I$  values and clinical plasma concentrations of erythromycin and clarithromycin

|                | <u>Clinical plasma concentration</u> |               |                      |               | <u>In vitro data in the present study</u> |                      |               |
|----------------|--------------------------------------|---------------|----------------------|---------------|-------------------------------------------|----------------------|---------------|
|                | $C_{max}$                            |               | $C_{max,u}$          |               | $K_I$                                     | $K_{I,u}$            |               |
|                | $\mu\text{g/mL}$                     | $\mu\text{M}$ | $f_u$                | $\mu\text{M}$ | $\mu\text{M}$                             | $f_{u,mic}$          | $\mu\text{M}$ |
| Erythromycin   | 0.82 <sup>29)</sup>                  | 1.12          | 0.645 <sup>29)</sup> | 0.721         | 0.512~1.82                                | 0.857 <sup>17)</sup> | 0.439~1.56    |
| Clarithromycin | 1.16 <sup>30)</sup>                  | 1.55          | 0.5 <sup>30)</sup>   | 0.775         | 0.689~2.69                                | 0.857                | 0.59~2.31     |

$f_u$ ; unbound fraction in human plasma,  $f_{u,mic}$ ; estimated unbound fraction in microsomal preparation

[29] Mylan Japan Inc. "Interview Form" (a drug information booklet) of Erythromycin Tablets 100, 200 mg, 7th edition (in Japanese); 2018.

[30] Taisho Medical Inc. "Interview Form" (a drug information booklet) of Clarithromycin Tablets 100, 200 mg, 25th edition (in Japanese); 2020.

[17] Ishikawa *et al.*, Inactivation kinetics and residual activity of CYP3A4 after treatment with erythromycin. *Biopharm Drug Dispos.* 2017; 38: 420-425.

## Supplemental Figure

Time-dependent inactivation of five CYP3A4 genetic variants by erythromycin or clarithromycin, as assessed by midazolam 1'-hydroxylation.

(a, f); CYP3A4.1, (b, g); CYP3A4.2, (c, h); CYP3A4.7, (d, i); CYP3A4.16, (e, j); CYP3A4.18.

The metabolic activity of CYP3A4 genetic variants, as assessed by midazolam 1'-hydroxylation, were reduced by erythromycin and clarithromycin in a preincubation time- and concentration-dependent manner. Preincubation period was designated for 0~30 min and 0~45 min for erythromycin and clarithromycin, respectively. Data are presented as mean±SD, n=5.

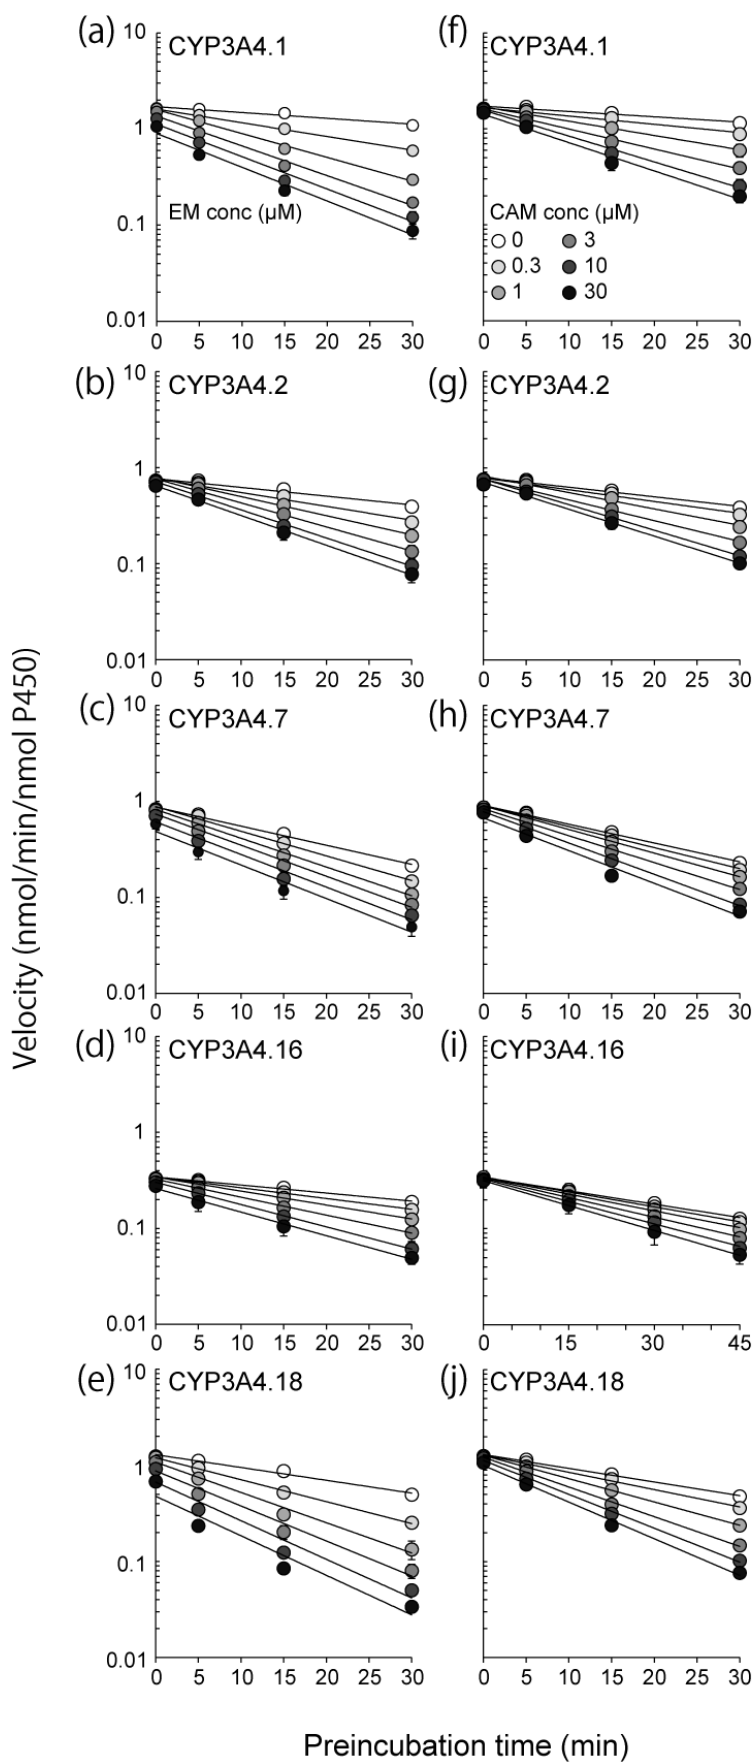

Supplemental Figure

Akiyoshi *et al.*,
